# Supplementary material
Source: PubMed Central journal article supplement (PMC3221775)
Supplement: NIHMS323477-supplement-01.pdf [file NIHMS323477-supplement-01.pdf]

# **Variants in the Netrin-1 Receptor UNC5C Prevent Apoptosis and Increase Risk for Familial Colorectal Cancer**

Marie-May Coissieux<sup>1</sup>, et al.

## **Supplementary Data**

Supplementary Table 1, Supplementary Figure 1, Supplementary Figure 2

## Suppl. Table/Figure Legends

### Supplementary Table 1: List of all coding variants found in *UNC5C*

### Supplementary Figure 1: Pedigrees of the families in which the proband had a mutation D353N, R603C and Q630E in *UNC5C*.

The probands screened for *UNC5C* mutations are indicated by red arrows. Individuals with cancer are shown as filled circles/squares. Different cancers are indicated beneath the relevant individuals, with age at diagnosis next to the cancer type. WT, normal sequence observed; X000X, mutations in *UNC5C* gene are indicated beneath individuals. Absence of a genotype indicates that DNA samples could not be obtained. BC (Breast Cancer). CaSU (Cancer Site Unknown). Crohn's (Crohn's disease). CRC (Colorectal Cancer). H&N (Head&Neck cancer). Roman numerals refer to generations, and individuals within a generation are numbered from left to right. ? indicates lack of information. Lozenge with a number inside indicates the number of siblings (brothers and sisters) with only fragmentary information. Family origin USA, F:France, P:Portugal.

### Supplementary Figure 2: Analysis of methylation profile of the *UNC5C* promoter region.

Change in MeCpG content in the region of the *UNC5C* promoter in tumors of the probands of families 4, 5, 11, 12 and 14. The position of each CpG is indicated from the *UNC5C* translation start site (ATG); the transcriptional start is indicated. At least 10 PCR clones were sequenced from each tumor (black) and from the corresponding normal blood tissues (red) to determine the percentage of methylation at the CpG sites in the analyzed region.

Supplementary Table 1

UNC5C Accession numbers NM\_003728, ENST00000331502

| SNP ID     | AA Variation | Exon | Nucleotide position | Domain               | No of Patients            | No of controls                  |
|------------|--------------|------|---------------------|----------------------|---------------------------|---------------------------------|
| rs1843018  | Synonymous   | 02   | c.234C>T            |                      | 56/191 (US), 7/105 (F)    |                                 |
| rs4699423  | Synonymous   | 02   | c.291T>C            |                      | 53/191 (US), 6/105 (F)    |                                 |
|            | Synonymous   | 03   | c.447C>A            |                      | 1/193 (US), 0/84 (F)      |                                 |
|            | Synonymous   | 05   | c.630C>T            |                      | 1/190(US), 0/78 (F)       |                                 |
|            | Synonymous   | 05   | c.639T>C            |                      | 1/190 (US), 0/78 (F)      |                                 |
| rs34875919 | Synonymous   | 05   | c.732T>C            |                      | 13/190 (US), 0/78 (F)     |                                 |
| -          | D353N        | 07   | c.1057G>A           | Thrombospondin       | 4/476 (US), 1/279 (F)     | 4/1416(US), 12/1648 (F)         |
| -          | I414V        | 08   | c.1240A>G           | Intracellular domain | 1/459 (US), 0/299 (F)     | 0/500 (US)                      |
|            | Synonymous   | 09   | c.1524G>A           |                      | 0/489 (US), 1/262(F)      |                                 |
|            | Synonymous   | 09   | c.1614G>A           |                      | 14/489 (US), 0/262(F)     |                                 |
| -          | <b>R603C</b> | 11   | c.1807C>T           | ZU5                  | 2/489 (US), 0/328 (F)     | 8/1408 (US), 1/1811 (F)         |
| rs2276322  | Synonymous   | 11   | c.1812A>C           |                      | 416/489 (US), 279/328 (F) |                                 |
| -          | <b>A628K</b> | 11   | c.1882_1883GC>AA    | ZU5                  | 2/489 (US), 3/328 (F)     | 3/1408(US), 2/1811(F), 0/100(P) |
| -          | <b>Q630E</b> | 11   | c.1888C>G           | ZU5                  | 1/489 (US), 1/328 (F)     | 1/1406(US), 3/1811(F)           |
|            | Synonymous   | 12   | c.2025C>A           |                      | 1/181 (US), 0/79(F)       |                                 |
| rs3733212  | Synonymous   | 12   | c.2037G>A           |                      | 162/181 (US), 1/79(F)     |                                 |
| rs2289043  | M721T        | 13   | c.2162T>C           | Intracellular domain | 164/193 (US), 50/67(F)    | 85/94(F)                        |
|            | Synonymous   | 15   | c.2514G>A           |                      | 2/479 (US), 0/265 (F)     |                                 |
| rs34585936 | A841T        | 15   | c.2521G>A           | Death Domain         | 23/498 (US), 4/265 (F)    | 24/499 (US), 38/983 (F)         |
|            | Synonymous   | 16   | c.2670C>T           |                      | 3/489 (US), 0/251 (F)     |                                 |

| SNP ID     | AA Variation | Exon | Nucleotide position | Genotype details (US)           | Genotype details (F)            |
|------------|--------------|------|---------------------|---------------------------------|---------------------------------|
| rs1843018  | Synonymous   | 02   | c.234C>T            | CC:0.707 CT:0.293 TT: 0         | CC:0.933 CT:0.066 TT: 0         |
| rs4699423  | Synonymous   | 02   | c.291T>C            | TT: 0.722 CT:0.278 CC: 0        | TT: 0.943 CT:0.057 CC: 0        |
|            | Synonymous   | 03   | c.447C>A            | CC:0.995 CA:0.005 AA:0          |                                 |
|            | Synonymous   | 05   | c.630C>T            | CC:0.995 CT: 0.005 TT:0         |                                 |
|            | Synonymous   | 05   | c.639T>C            | TT:0.995 TC:0.005 CC:0          |                                 |
| rs34875919 | Synonymous   | 05   | c.732T>C            | TT:0.932 TC:0.068 CC:0          |                                 |
| -          | D353N        | 07   | c.1057G>A           | GG:0.991 GA:0.009 AA:0          | GG:0.996 GA:0.004 AA:0          |
| -          | I414V        | 08   | c.1240A>G           | AA:0.998 AG:0.002 GG:0          |                                 |
|            | Synonymous   | 09   | c.1524G>A           |                                 | GG:0.996 GA:0.004 AA:0          |
|            | Synonymous   | 09   | c.1614G>A           | CC:0.971 CT:0.029 TT:0          |                                 |
| -          | <b>R603C</b> | 11   | c.1807C>T           | CC:0.996 CT:0.004 TT:0          |                                 |
| rs2276322  | Synonymous   | 11   | c.1812A>C           | AA:0.150 AC:0.425 CC:0.425      | AA:0.149 AC:0.427 CC:0.424      |
| -          | <b>A628K</b> | 11   | c.1882_1883GC>AA    | GC/GC:0.996 GC/AA:0.004 AA/AA:0 | GC/GC:0.991 GC/AA:0.009 AA/AA:0 |
| -          | <b>Q630E</b> | 11   | c.1888C>G           | CC:0.998 CG:0.002 GG:0          | CC:0.997 CG:0.003 GG:0          |
|            | Synonymous   | 12   | c.2025C>A           | CC:0.995 CA:0.005 AA:0          |                                 |
| rs3733212  | Synonymous   | 12   | c.2037G>A           | GG:0.105 GA:0.486 AA:0.409      | GG:0.987 GA:0.126 AA:0          |
| rs2289043  | M721T        | 13   | c.2162T>C           | TT:0.150 TC:0.451 CC:0.399      | TT:0.254 TC:0.463 CC:0.283      |
|            | Synonymous   | 15   | c.2514G>A           | GG:0.996 GA:0.004 AA:0          |                                 |
| rs34585936 | A841T        | 15   | c.2521G>A           | GG:0.954 GA:0.014 TT:0.032      | GG:0.985 GA:0.015 TT:0          |
|            | Synonymous   | 16   | c.2670C>T           | CC:0.994 CT:0.006 TT:0          |                                 |

Supplementary Figure 1

Family 6, USA

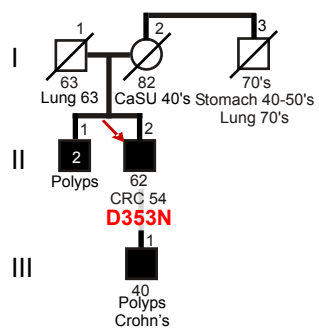

Family 7, USA

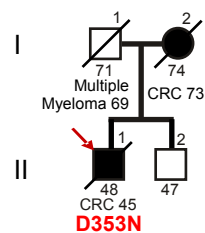

Family 8, USA

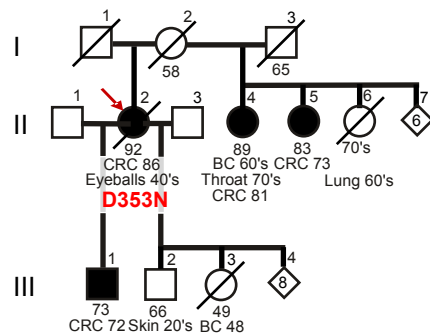

Family 9, USA

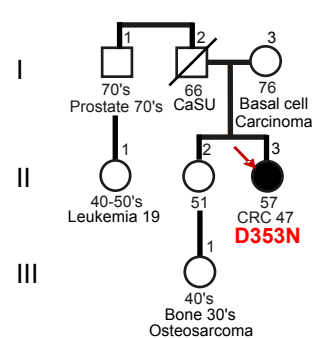

Family 10, F

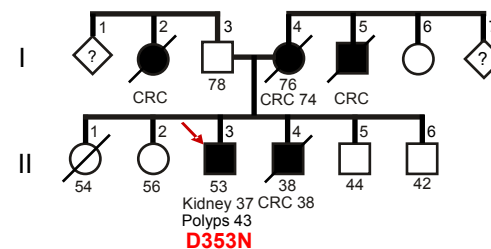

Family 11, USA

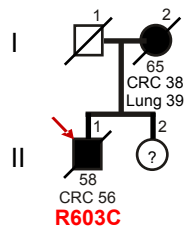

Family 12, USA

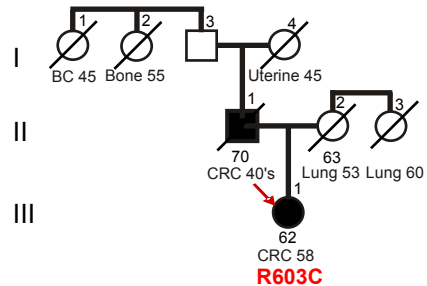

Family 13, F

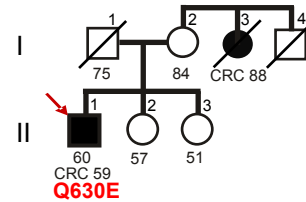

Family 14, USA

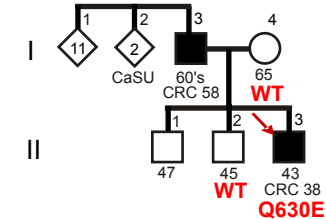

Supplementary Figure 2

Normal  
Tumoral

Proband family 4, A628K

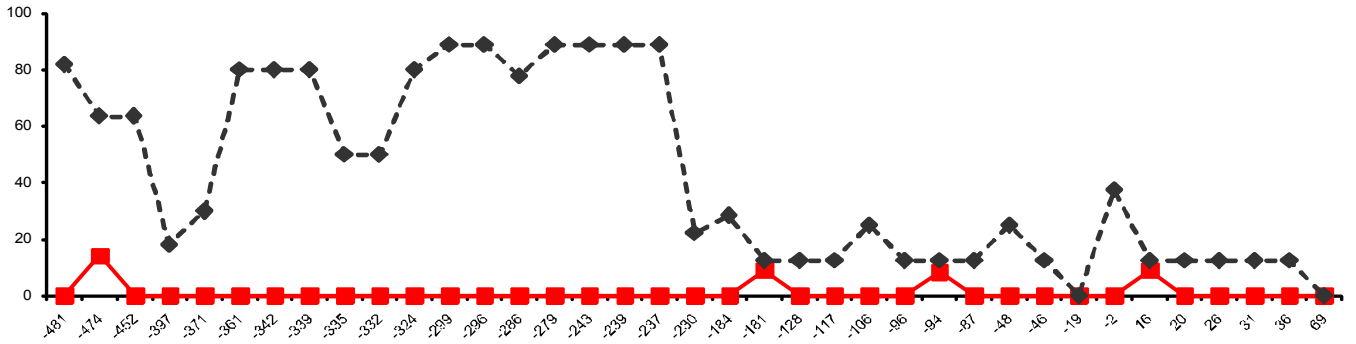

Proband family 5, A628K

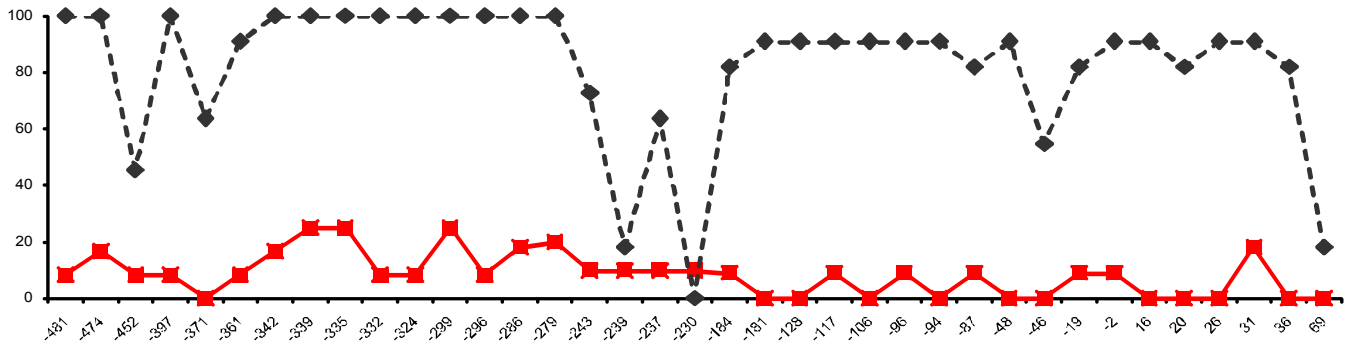

% of MeCpG on coding strand

Proband family 11, R603C

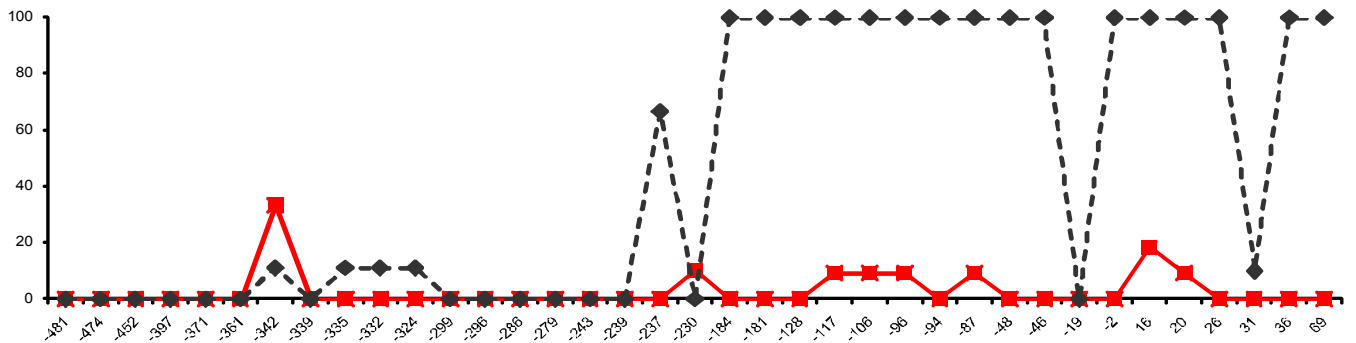

Proband family 12, R603C

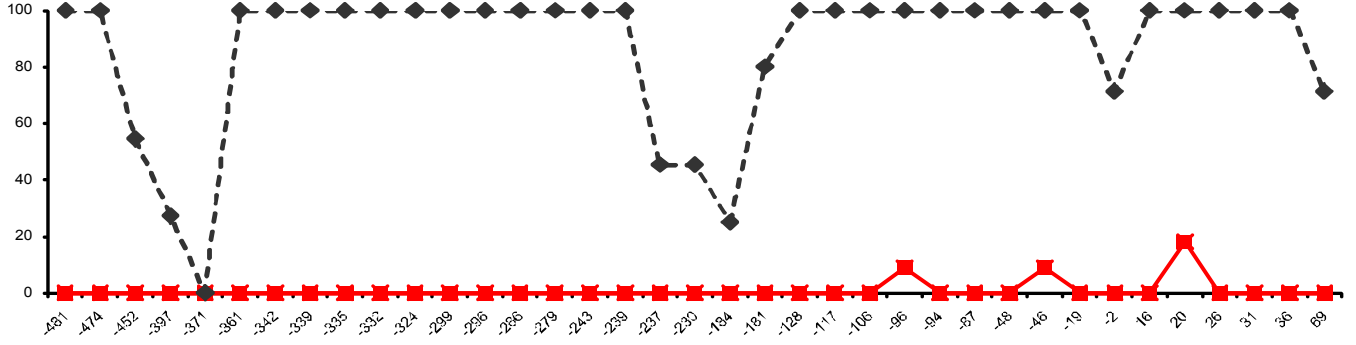

Proband family 14, Q630E

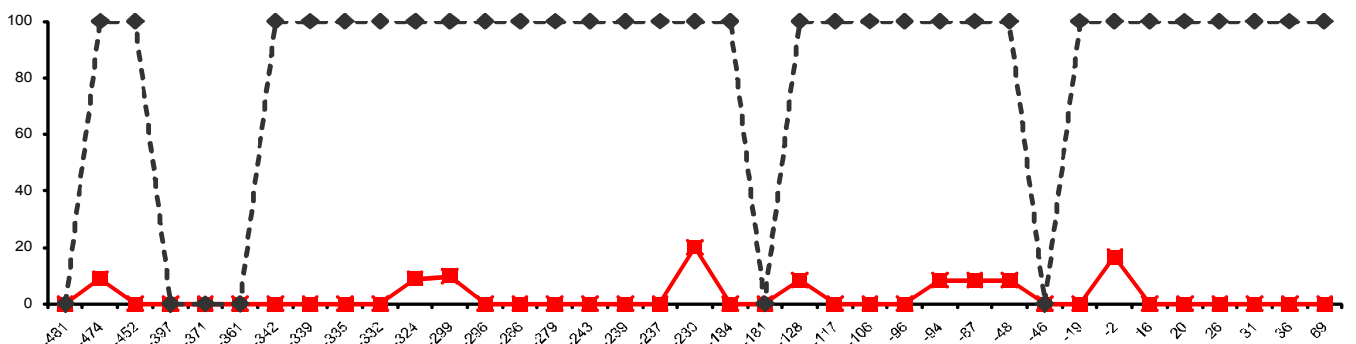

+1 Transcription

ATG
